# Supplementary material for: Selective and local flash-annealing for improvement in the contact characteristics of MoS 2 transistors
Source: Royal Society of Chemistry journal article supplement (doi:10.1039/d5nr00114e), 2025-01-01
Supplement: d5nr00114e1.pdf [file d5nr00114e1.pdf]

## Supplementary Information

### Selective and local flash-annealing for improvement in contact characteristics of MoS<sub>2</sub> transistors

*Jun-Hwe Cha,<sup>1,†</sup> Inseong Lee,<sup>1,†</sup> Seol Won Yun,<sup>1,†</sup> Woonggi Hong,<sup>2</sup> Hyo Hoon Byeon,<sup>1</sup>  
Jungyeop Oh,<sup>1</sup> Seo Hak Park,<sup>1</sup> and Sung-Yool Choi<sup>1,\*</sup>*

<sup>1</sup>School of Electrical Engineering, Graduate School of Semiconductor Technology  
Korea Advanced Institute of Science and Technology (KAIST)  
291 Daehak-ro, Yuseong-gu, Daejeon 34141, Republic of Korea

\*E-mail: [sungyool.choi@kaist.ac.kr](mailto:sungyool.choi@kaist.ac.kr)

<sup>2</sup>School of Electronics and Electrical Engineering  
Dankook University  
152 Jukjeon-ro, Suji-gu, Yongin-si, Gyeonggi-do 16890, Republic of Korea

†These authors contributed equally to this work.

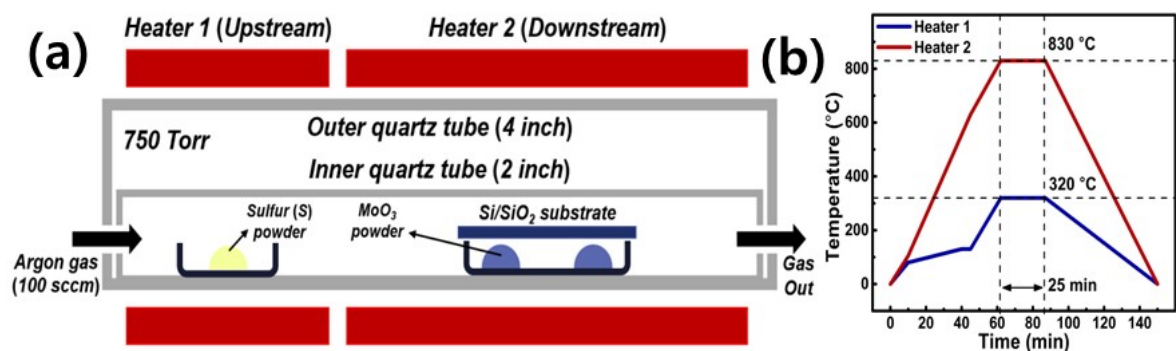

**Supplementary Fig. 1.** (a) Schematic of powder-based chemical vapor deposition (CVD) equipment for molybdenum disulfide. (b) Temperature-time profile of the CVD MoS<sub>2</sub>.

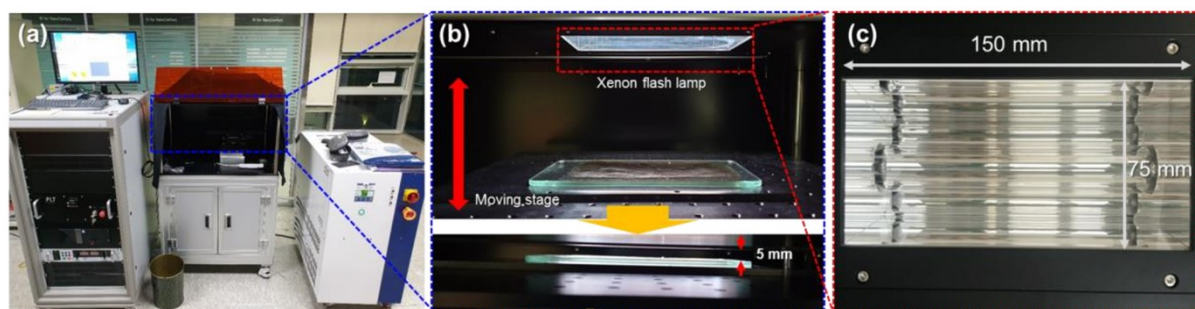

**Supplementary Fig. 2.** Optical images of (a) intensive pulsed light (IPL) system, (b) IPL moving stage, and (c) IPL xenon flash lamp.

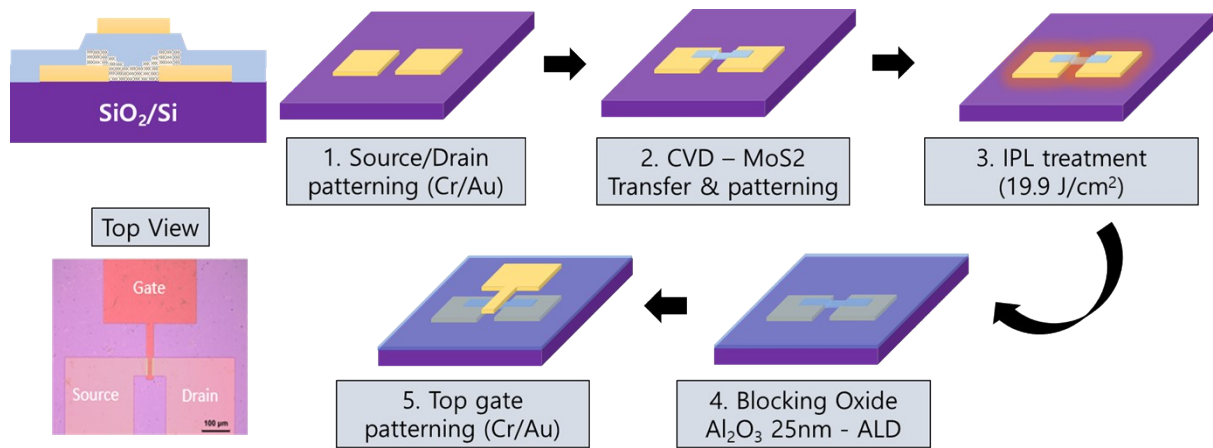

**Supplementary Fig. 3.** Schematic images of device fabrication processes.

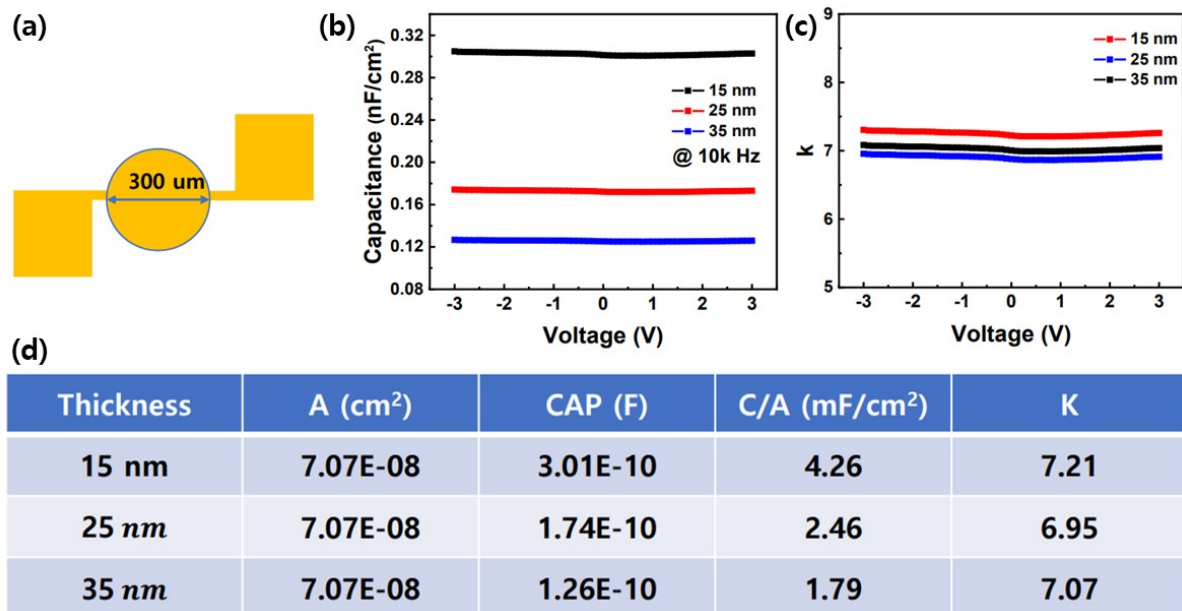

**Supplementary Fig. 4.** (a) Schematic image of the MIM pattern measured on various Al<sub>2</sub>O<sub>3</sub> thickness (15–35 nm). (b) Capacitance-voltage characteristics of the Au/Al<sub>2</sub>O<sub>3</sub>/Au structure. (c) Extracted dielectric constant on Al<sub>2</sub>O<sub>3</sub> thickness from the (b). (d) Dielectric properties of the Al<sub>2</sub>O<sub>3</sub> gate insulator on thickness deposited by atomic layer deposition.

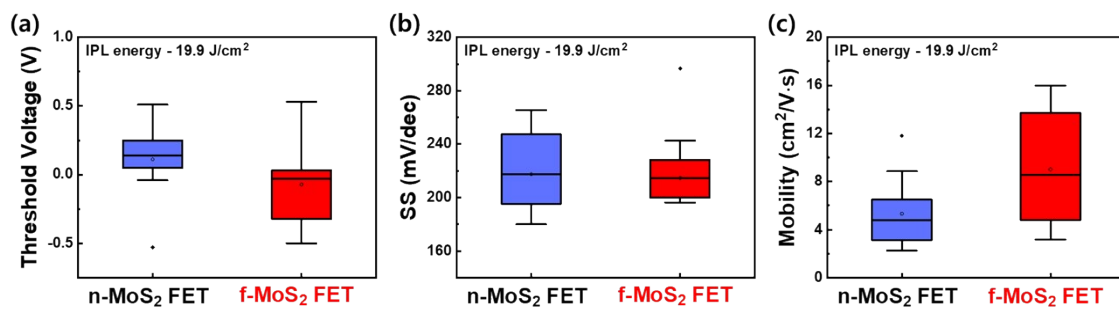

**Supplementary Fig. 5.** Distribution of (a) threshold voltage, (b) SS and (c) mobility in n-MoS<sub>2</sub> FET and f-MoS<sub>2</sub> FET.

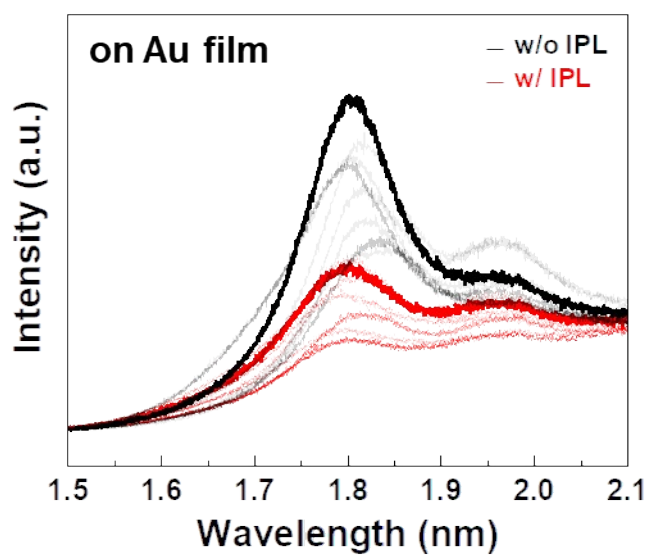

**Supplementary Fig. 6.** Photoluminescence (PL) spectra of MoS<sub>2</sub> and f-MoS<sub>2</sub> on Au. For the optical measurement on Au, 15 points from a couple of MoS<sub>2</sub> samples were obtained.

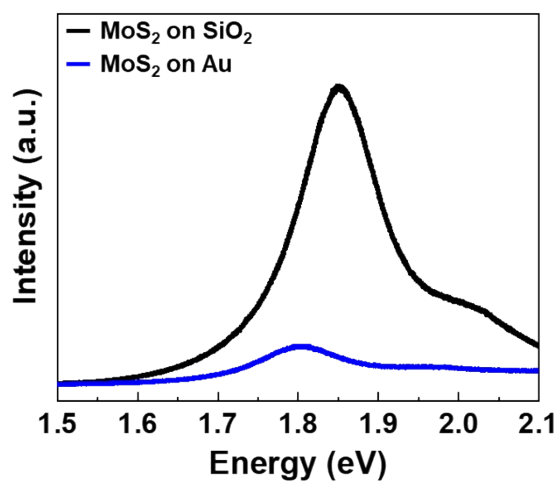

**Supplementary Fig. 7.** PL spectra of MoS<sub>2</sub> on SiO<sub>2</sub> (black) and Au (blue). Significant photoluminescence quenching was found owing to charge transfer from Au to MoS<sub>2</sub> after the MoS<sub>2</sub> was transferred on the Au thin film.

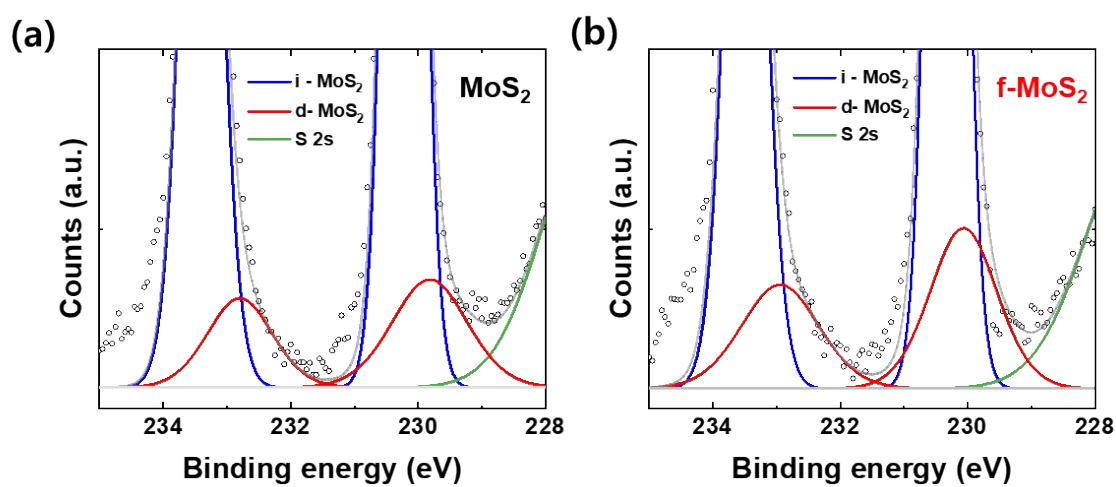

**Supplementary Fig. 8.** Zoomed-in XPS spectra of Mo 3d, showing a clear comparison of d-MoS<sub>2</sub> content in (a) MoS<sub>2</sub> and (b) f-MoS<sub>2</sub>.

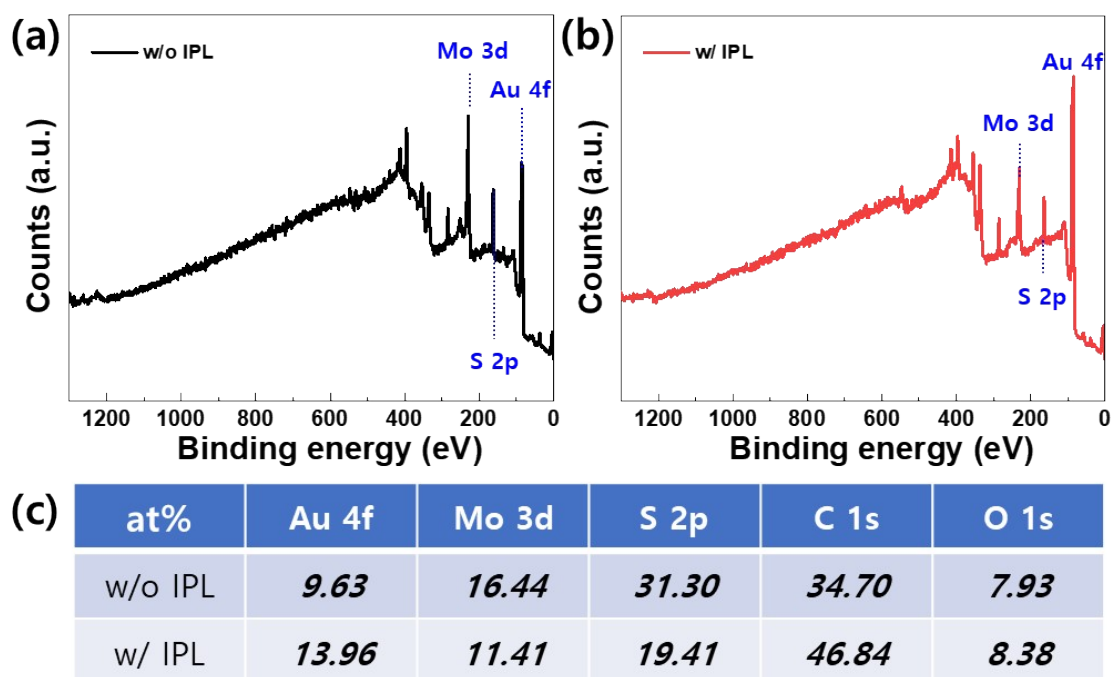

**Supplementary Fig. 9.** Survey XPS spectrum of (a) MoS<sub>2</sub> and (b) F-MoS<sub>2</sub> on Au film. Note that MoS<sub>2</sub> thin films treated with the flash exposure was denoted as F-MoS<sub>2</sub> in Manuscript. (c) Surface concentration (atomic percent) determined by XPS for MoS<sub>2</sub> (w/o IPL) and F-MoS<sub>2</sub> (w/ IPL) on Au film.

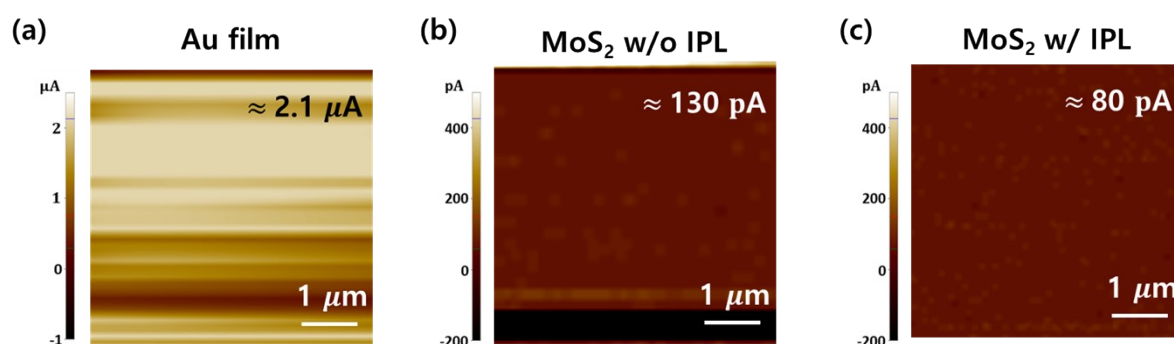

**Supplementary Fig. 10.** Conductive atomic force microscopy (C-AFM) mapping images of Au film, MoS<sub>2</sub> on Au film, and f-MoS<sub>2</sub> on Au film.

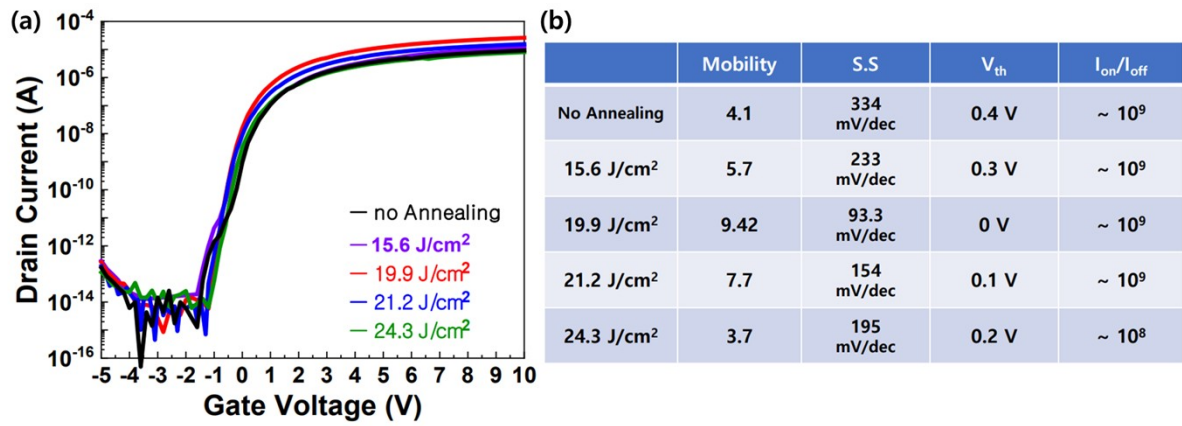

**Supplementary Fig. 11.** Transfer curves of the MoS<sub>2</sub> FETs on the flash annealing processes of various light energies from 15.6 to 24.3 Jcm<sup>-2</sup> (15.6, 19.9, 21.2, and 24.3 Jcm<sup>-2</sup>). It was found that the devices irradiated with the light energy density of 19.9 Jcm<sup>-2</sup> exhibits the best performance.

### **Supplemental References**

1. Cho, Soo-Yeon, Hyeong-Jun Koh, Hae-Wook Yoo, Jong-Seon Kim, and Hee-Tae Jung. "Tunable volatile-organic-compound sensor by using Au nanoparticle incorporation on MoS<sub>2</sub>." *ACS sensors* 2, no. 1 (2017): 183-189.
